# Supplementary material for: Intrinsic memory behavior of rough silicon nanowires and enhancement via facile Ag NPs decoration
Source: Royal Society of Chemistry journal article supplement (doi:10.1039/c1jm10473j), 2011-01-01
Supplement: c1jm10473j.pdf [file c1jm10473j.pdf]

## Supporting Information

# Intrinsic memory behavior of rough silicon nanowires and enhancement *via* facile Ag NPs decoration

By Ji-Hyuk Choi, Jinwoo Sung, Kyeong-Ju Moon, Joohee Jeon, Youn Hee Kang, Cheolmin Park and  
Jae-Min Myoung\*

Department of Materials Science and Engineering, Yonsei University,

\* Correspondence should be addressed to 134 Shinchon-dong, Seodaemoon-gu, Yonsei University,  
Seoul, Postal #120-749. Telephone: (82-2)2123-2843. Fax: (82-2)312-5375. E-mail:  
[jmmyoung@yonsei.ac.kr](mailto:jmmyoung@yonsei.ac.kr).

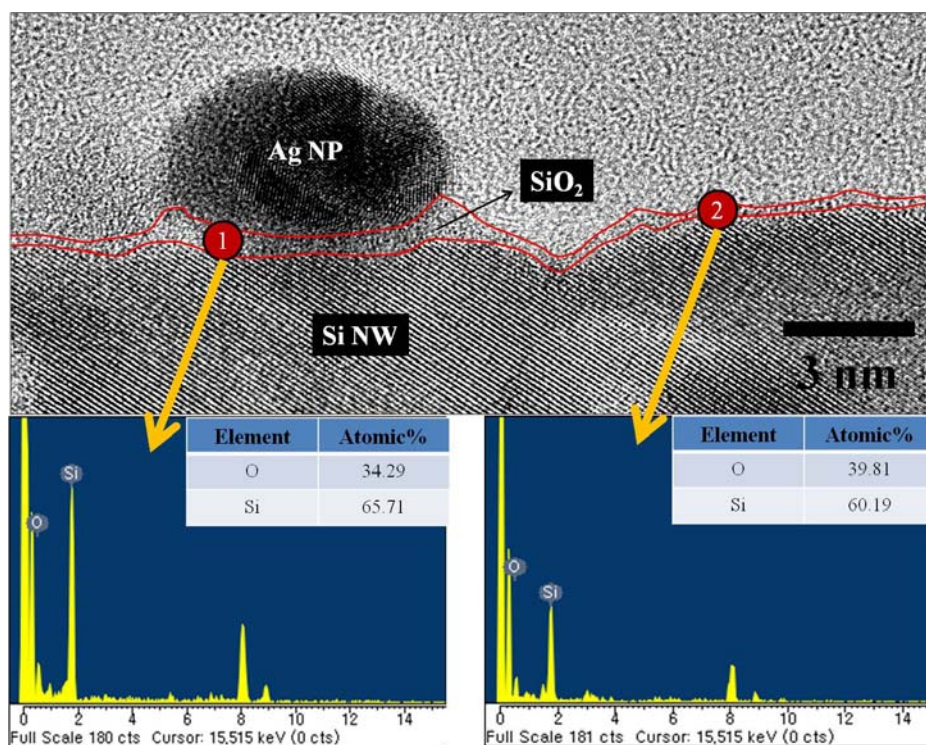

**Fig. S1.** The HRTEM image shows an EE Si NW with Ag NP on the SiO<sub>2</sub> surface. Non-uniform and very thin native oxide layer can be seen in this image. Moreover, STEM-EDS analyses on the oxide layers with and without Ag NPs (region 1 and 2, respectively) show different compositions. These results imply that their identities are distinguishable. For better understanding, more detailed experiments are needed. Here, we just hypothesize that SiO<sub>2</sub> blocking layer can be synthesized by simple chemical reaction, finally leading to a stable memory operation.

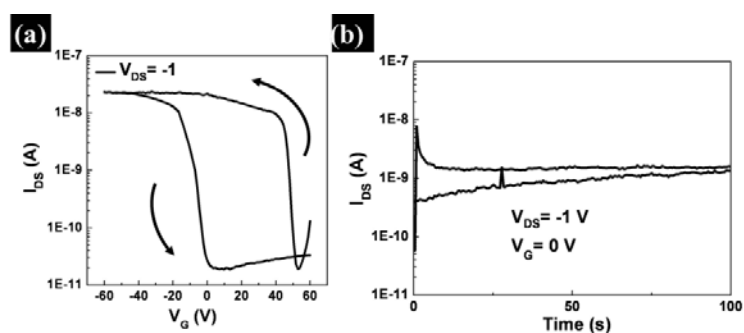

**Fig. S2.** (a) The transfer curves for EE Si NW FET at different ranges of  $V_G$  sweep of  $\pm 60$  V. For hysteresis measurement, transfer curves of forward sweep and backward sweep are shown. The directions of the forward and backward sweeps are indicated. (b) Time dependent stability of conductance in the two states. The off-state “0” was obtained with a  $V_G$  of  $-40$  V and on-state “1” with a  $V_G$  of  $40$  V for 1s, showing very short charge storage duration.
